# Supplementary material
Source: Royal Society of Chemistry journal article supplement (doi:10.1039/d6el00066e)
Supplement: d6el00066e1.pdf [file d6el00066e1.pdf]

## Supplementary Information

# Boosting Z-scheme water splitting via increasing electron transport by manipulating multiple redox-active sites and potentials in metal hexacyanoferrate modifiers

Harutaka Ninomiya,<sup>a</sup> Osamu Tomita,<sup>a</sup> Hajime Suzuki,<sup>a,b</sup> Akinobu Nakada,<sup>a</sup> Rie Haruki,<sup>c</sup> Shunsuke Nozawa,<sup>c</sup> and Ryu Abe<sup>\*a</sup>

<sup>a</sup> *Department of Energy and Hydrocarbon Chemistry, Graduate School of Engineering, Kyoto University, Nishikyo-ku, Kyoto 615-8510, Japan. \*E-mail: ryu-abe@scl.kyoto-u.ac.jp*

<sup>b</sup> *Precursory Research for Embryonic Science and Technology (PRESTO), Japan Science and Technology Agency (JST), Kawaguchi, Saitama 332-0012, Japan*

<sup>c</sup> *Photon Factory (PF), Institute of Materials Structure Science (IMSS), High Energy Accelerator Research Organization (KEK), Tsukuba, Ibaraki 305-0801, Japan*

## Experimental

### Reagents

All aqueous solutions were prepared with Milli-Q ultrapure water (18.2 M $\Omega$ ·cm at 25 °C). The manufacturers and purity of the reagents were as follows: InCl<sub>3</sub>·4H<sub>2</sub>O (Kanto Chemical Co., Inc., 99.95%), MnCl<sub>2</sub>·4H<sub>2</sub>O (FUJIFILM Wako Pure Chemical Co., Inc., 99.0%), FeCl<sub>2</sub>·4H<sub>2</sub>O (FUJIFILM Wako Pure Chemical Co., Inc., 99.0–102.2%), CoCl<sub>2</sub>·6H<sub>2</sub>O (FUJIFILM Wako Pure Chemical Co., Inc., 99.5%), NiCl<sub>2</sub>·6H<sub>2</sub>O (FUJIFILM Wako Pure Chemical Co., Inc., 98.0%), CuCl<sub>2</sub>·4H<sub>2</sub>O (FUJIFILM Wako Pure Chemical Co., Inc., 99.9%), K<sub>4</sub>[Fe(CN)<sub>6</sub>]·3H<sub>2</sub>O (Kishida Chemical Co., Ltd., 99.5%), K<sub>3</sub>[Fe(CN)<sub>6</sub>] (FUJIFILM Wako Pure Chemical Co., Inc., 99%), ZrO(NO<sub>3</sub>)<sub>2</sub>·2H<sub>2</sub>O (Kanto Chemical Co., Inc., 99.0%), Ta<sub>2</sub>O<sub>5</sub> (Kojundo Chemical Co., Ltd., 99.9%), Na<sub>3</sub>RhCl<sub>6</sub>·*n*H<sub>2</sub>O (Kanto Chemical Co., Inc., >80.0%), K<sub>2</sub>CrO<sub>4</sub> (FUJIFILM Wako Pure Chemical Co., Inc., 99.0%), Bi<sub>2</sub>O<sub>3</sub> (FUJIFILM Wako Pure Chemical Co., Inc., 98%), BiOCl (FUJIFILM Wako Pure Chemical Co., Inc., 95.0%), NaCl (FUJIFILM Wako Pure Chemical Co., Inc., 99.5%), CsCl (FUJIFILM Wako Pure Chemical Co., Inc., 99.0%), FeCl<sub>3</sub>·6H<sub>2</sub>O (FUJIFILM Wako Pure Chemical Co., Inc., 99.5%), RuCl<sub>3</sub>·*n*H<sub>2</sub>O (FUJIFILM Wako Pure Chemical Co., Inc., 36–44% as Ru metal), Na<sub>2</sub>SiO<sub>3</sub>·9H<sub>2</sub>O (FUJIFILM Wako Pure Chemical Co., Inc., 98.0%), Na<sub>2</sub>WO<sub>4</sub>·2H<sub>2</sub>O (FUJIFILM Wako Pure Chemical Corporation, 99.0–100.5%), VOSO<sub>4</sub>·*n*H<sub>2</sub>O (FUJIFILM Wako Pure Chemical Corporation, 99.9%), HCl (FUJIFILM Wako Pure Chemical Corporation, 35.0–37.0%), KCl (FUJIFILM Wako Pure Chemical Co., Inc., 99.5%), H<sub>3</sub>BO<sub>3</sub> (FUJIFILM Wako Pure Chemical Co., Inc., 99.5%), CH<sub>3</sub>COOH (FUJIFILM Wako Pure Chemical Co., Inc.), CH<sub>3</sub>COONa (Kanto Chemical Co., Inc., >99.0%), KH<sub>2</sub>PO<sub>4</sub> (FUJIFILM Wako Pure Chemical Corporation, 99.5%).

### Characterization of synthesized samples

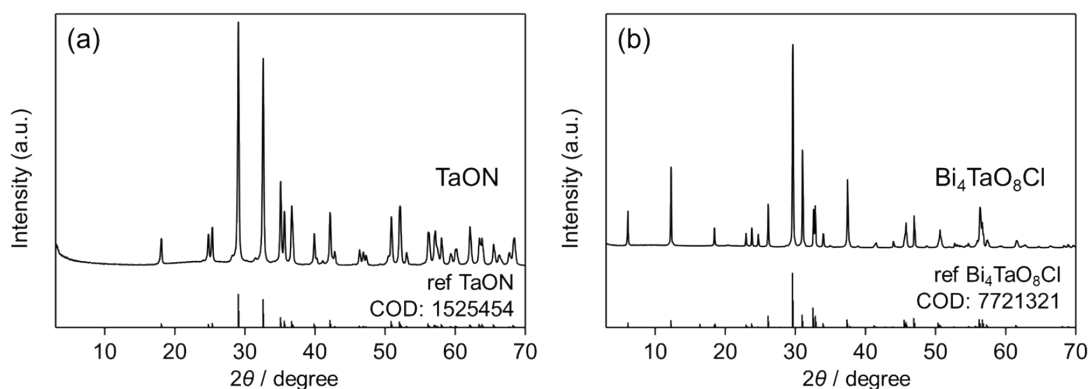

**Figure S1.** XRD patterns of synthesized samples: (a) TaON and (b) Bi<sub>4</sub>TaO<sub>8</sub>Cl. Reference patterns obtained from the Crystallography Open Database (COD 1525454 for TaON and COD 7721321 for Bi<sub>4</sub>TaO<sub>8</sub>Cl) are shown for comparison.<sup>1,2</sup>

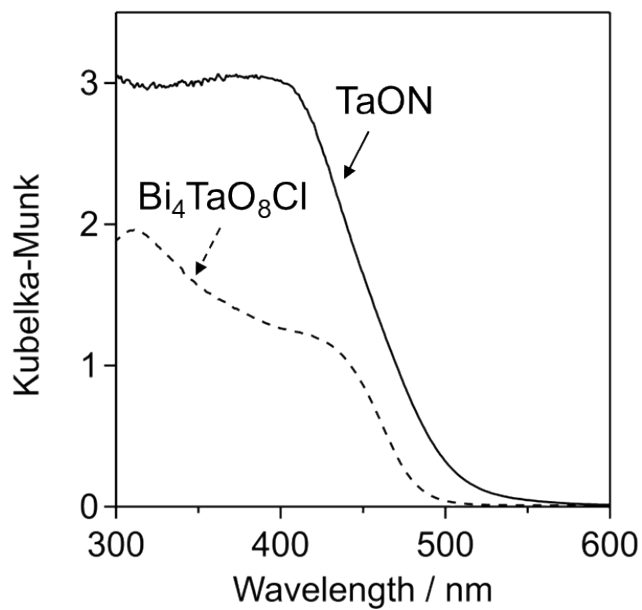

**Figure S2.** UV-Vis diffuse reflectance spectra of TaON and Bi<sub>4</sub>TaO<sub>8</sub>Cl.

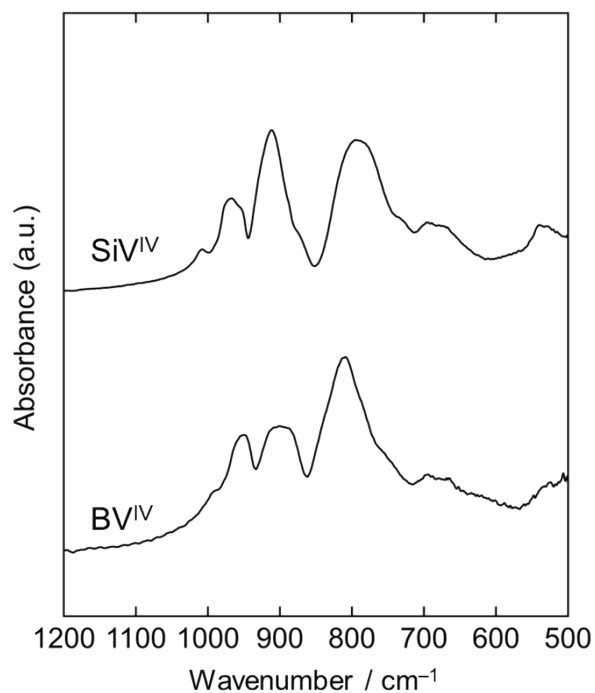

**Figure S3.** FT-IR spectra of polyoxometalate: SiV<sup>IV</sup> (K<sub>6</sub>[ $\alpha$ -SiV<sup>IV</sup>W<sub>11</sub>O<sub>40</sub>] $\cdot$ 11H<sub>2</sub>O) and BV<sup>IV</sup> (K<sub>7</sub>[ $\alpha$ -BV<sup>IV</sup>W<sub>11</sub>O<sub>40</sub>] $\cdot$ 7H<sub>2</sub>O). For the measurements, the samples were ground and diluted to 1 wt% with KBr, followed by pelletization. The spectral pattern and the peak wavenumbers are in good agreement with those reported previously.<sup>3-5</sup>

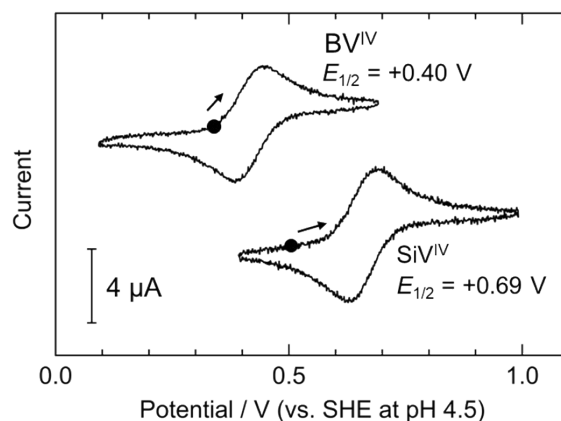

**Figure S4.** CVs of 0.5 mM SiV<sup>IV</sup> and BV<sup>IV</sup> in an aqueous solution of 0.05 M KH<sub>2</sub>PO<sub>4</sub> (pH 4.5). A glassy carbon electrode was used as the working electrode, Pt as the counter electrode, and Ag/AgCl as the reference electrode. The scan rate was 50 mV s<sup>-1</sup>. Black circles denote the open circuit potential for each POM solution.

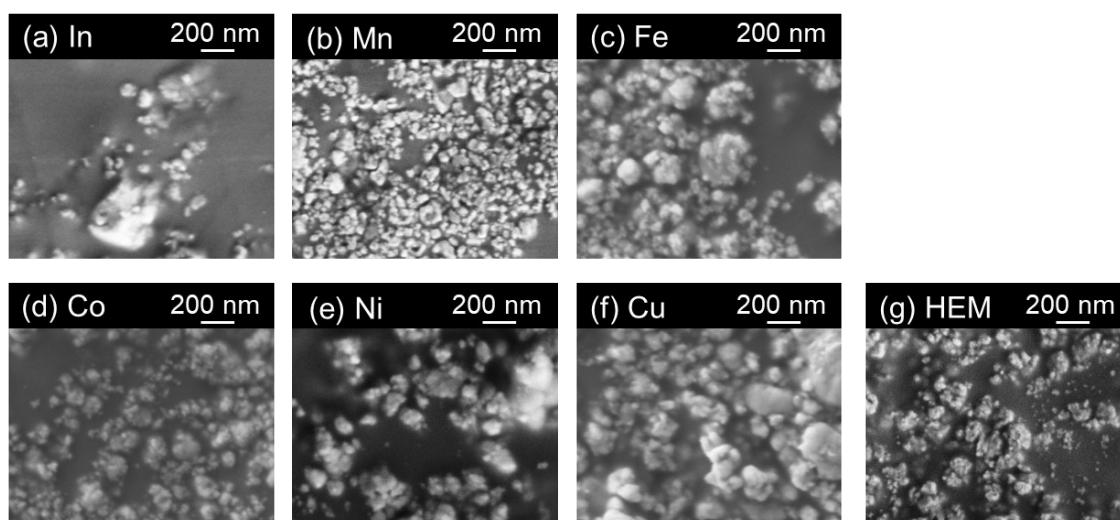

**Figure S5.** SEM images of MHCs with Fe<sub>c</sub> = Fe<sup>II</sup>. Note that the dark, smooth background is carbon tape.



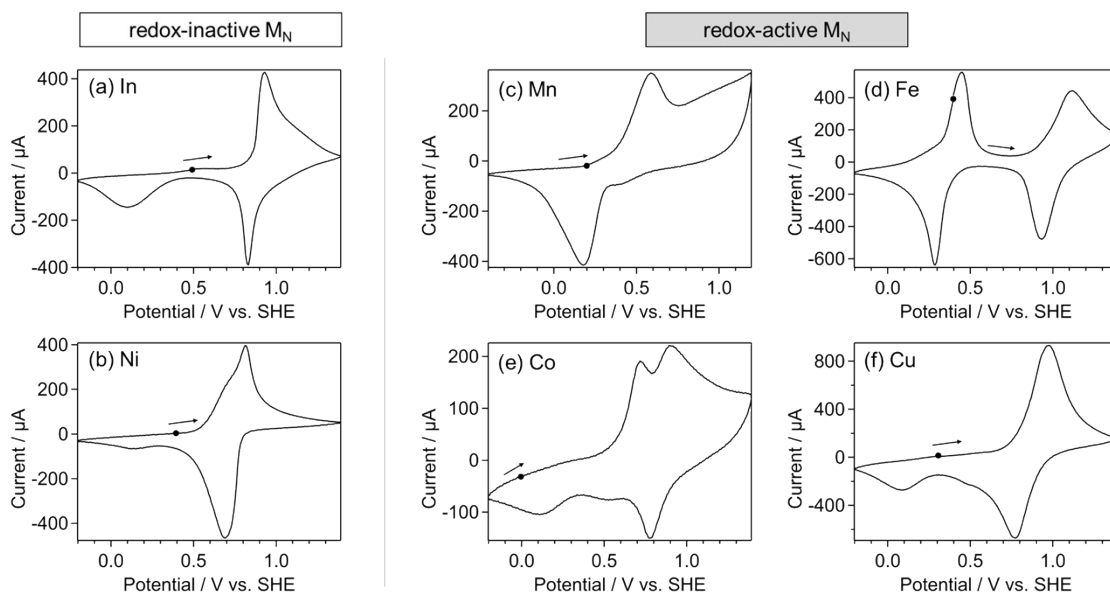

**Figure S8.** CVs of MHCFs with redox-inactive  $M_N$  ((a) InHCF, (b) NiHCF) and redox-active  $M_N$  ((c) MnHCF, (d) FeHCF, (e) CoHCF, and (f) CuHCF) in 0.05 M  $\text{KH}_2\text{PO}_4$  aqueous solution. Initial potential was set to the open rest potential, and scanning began in the anodic direction ( $50 \text{ mV s}^{-1}$ ).

CVs of redox-active MHCFs and redox-inactive MHCFs with single  $M_N$  species measured in an aqueous medium are provided in **Figure S8**. The irreversible reduction peak at approximately +0.1 V to a greater or lesser extent likely arise from the reduction of dissolved  $[\text{Fe}^{\text{III}}(\text{CN})_6]^{3-}$ , which is supported by the fact that these cathodic currents are exhibited only after the anodic scan and oxidizing  $\text{Fe}_C^{\text{II}}$  to  $\text{Fe}_C^{\text{III}}$ ; further, a previous report indicates that some of the oxidized MHCFs with  $\text{Fe}_C^{\text{III}}$  are partially soluble in water depending on the  $M_N$  species.<sup>6</sup> The assignments of the redox peaks in the CVs of each MHCf are described below.

InHCF and NiHCF display a pair of redox peaks with half-wave potential ( $E_{1/2}$ ) at +0.87 V and +0.75 V vs SHE, respectively, assignable to  $\text{Fe}_C^{\text{III/II}}$ .<sup>7,8</sup>

Although CuHCF appears to have a single redox couple in the wide scan CV (**Figure S8(f)**), previous reports state that the  $\text{Cu}^{\text{II/I}}$  in CuHCF is redox-active, exhibiting another, smaller but detectable, pair of redox peaks with an  $E_{1/2}$  of  $\sim +0.16 \text{ V}$  vs SHE.<sup>9-11</sup> Two distinct  $\text{Cu}^{\text{II/I}}$  redox sites have been proposed: one associated with Cu species located at interstitial sites and the other with Cu species incorporated in the lattice, coordinated to the nitrogen atoms of the cyanide ligands.<sup>9,11,12</sup> As shown in **Figure S9**, the CV measured over a narrowed potential window (0–0.65 V vs SHE) exhibits two oxidation peaks at +0.54 and +0.33 V (A and B), along with a broad reduction peak centered at approximately +0.16 V (C). These features are not discernible in the wide-scan CVs (**Figure S8(f)**). Notably, the oxidation peak A was not observed at the 1st anodic scan (curves with black color), which started at approximately +0.5 V (i.e., each rest potential), but appeared at the 2nd anodic scan after the cathodic scan beyond +0.3 V, at which the cathodic peak C appeared to rise. Because CuHCF was synthesized using a  $\text{Cu}^{\text{II}}$  precursor, the Cu species

in the as-prepared material were expected to be in the divalent state. Therefore, the appearance of peak A only after the first cathodic scan could be attributed to the oxidation of  $\text{Cu}^{\text{I}}$  to  $\text{Cu}^{\text{II}}$ , formed during the first cathodic scan. The intensity of oxidation peak A increased as the cathodic-to-anodic turning potential became more negative, from +0.3 to 0 V, while peak B increased markedly below +0.2 V, indicating that both A and B were coupled to the reduction peak C, which appeared broad owing to the close potentials of the two reduction processes. Peak A was assigned to the oxidation of interstitial Cu species, while peak B arose from lattice Cu species coordinated to cyanide nitrogen. Accordingly, the following discussion focuses on the two redox-active species in CuHCF: lattice  $\text{Cu}^{\text{II/I}}$  and  $\text{Fe}_{\text{C}}^{\text{III/II}}$  ( $E_{1/2} = +0.24$  V and +0.88 V).

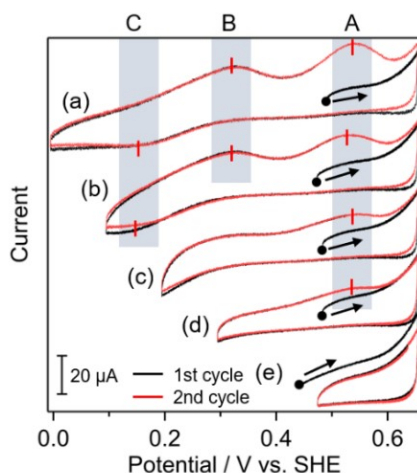

**Figure S9.** CVs of CuHCF in 0.05 M  $\text{KH}_2\text{PO}_4$  aqueous solution (pH 4.5) with sequentially expanded scan windows: (a) 0.0–0.65 V, (b) 0.10–0.65 V, (c) 0.20–0.65 V, (d) 0.29–0.65 V, and (e) 0.45–0.65 V vs SHE. Scans started from the rest potential in the cathodic direction.

FeHCF (Prussian blue) and CoHCF exhibited two distinct redox couples (**Figure S8(d),(e)**). In FeHCF, the positive and negative peaks corresponded to  $\text{Fe}^{\text{III/II}}$  coordinated to carbon ( $\text{Fe}_{\text{C}}^{\text{III/II}}$ : +1.03 V) and nitrogen ( $\text{Fe}_{\text{N}}^{\text{III/II}}$ : +0.37 V), respectively, whereas in CoHCF, they corresponded to  $\text{Co}^{\text{III/II}}$  (+0.84 V) and  $\text{Fe}_{\text{C}}^{\text{III/II}}$  (+0.62 V).<sup>13,14</sup>

Although previous reports revealed that Mn in MnHCF was redox-active and exhibited two distinct redox couples assigned to  $\text{Mn}^{\text{III/II}}$  and  $\text{Fe}_{\text{C}}^{\text{III/II}}$  in organic solution,<sup>13,15</sup> the CV of MnHCF measured in aqueous media (**Figure S8(c)**) did not display two distinct redox couples. Instead, its voltammetric profile more closely resembled those of  $\text{MnO}_2$  and  $\text{MnCl}_2$  in water (**Figure S10(a)**) than that of MnHCF in acetonitrile (**Figure S10(b),(c)**). This is likely due to disproportionation of the  $\text{Mn}^{\text{III}}$  species released during the anodic scan:  $2\text{Mn}^{\text{III}} + 2\text{H}_2\text{O} \rightarrow \text{Mn}^{\text{II}} + \text{MnO}_2 + 4\text{H}^+$ .<sup>16–19</sup> Therefore, the decomposition of MnHCF via  $\text{Mn}^{\text{III}}$  species, together with the dissolution of  $[\text{Fe}^{\text{III}}(\text{CN})_6]^{3-}$  and/or  $[\text{Fe}^{\text{II}}(\text{CN})_6]^{4-}$ , produces  $\text{Mn}^{\text{II}}$  species and  $\text{MnO}_2$  that account for the dominant currents. Indeed, the CV of MnHCF in acetonitrile solution exhibited two distinct pairs of redox waves (**Figure S10(b),(c)**), unlike  $\text{MnO}_2$ , with similar  $E_{1/2}$  to those reported previously.<sup>15</sup> These experiments imply that MnHCF has intrinsic instability when used in aqueous media.

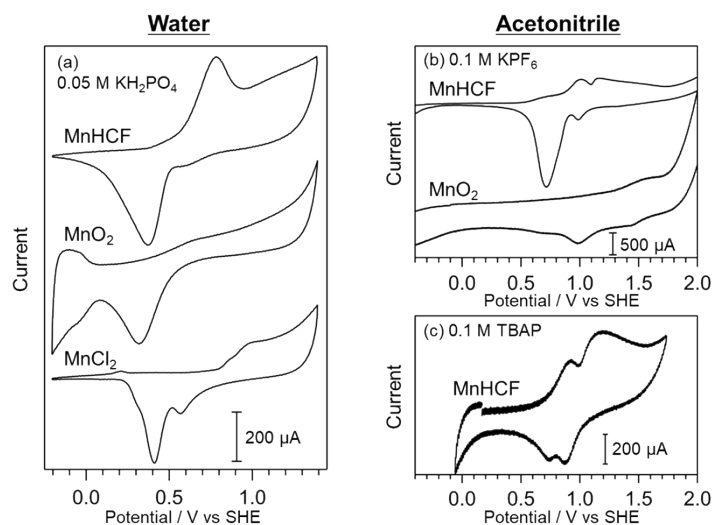

**Figure S10.** CVs of MnHCF, MnO<sub>2</sub>, and MnCl<sub>2</sub> in (a) an aqueous solution of 0.05 M KH<sub>2</sub>PO<sub>4</sub> (pH 4.5), and an acetonitrile solution of (b) 0.1 M KPF<sub>6</sub> and (c) 0.1 M tetrabutylammonium perchloride (TBAP).

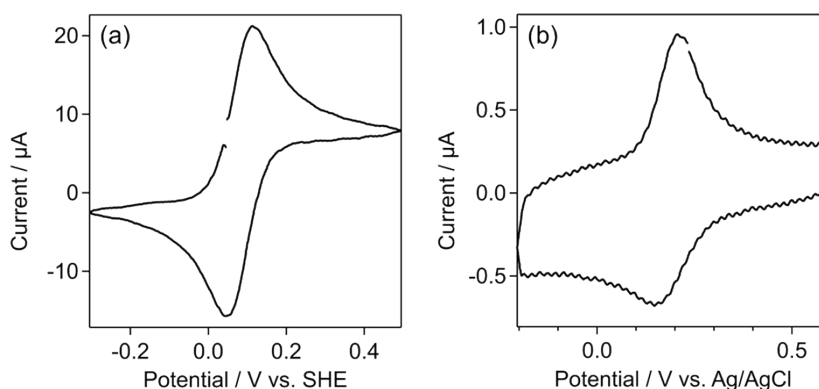

**Figure S11.** CVs of ferrocene (Fc) in (a) 0.1 M KPF<sub>6</sub> acetonitrile solution and (b) 0.05 M KH<sub>2</sub>PO<sub>4</sub> aqueous solution. The half-wave potential of Fc<sup>+</sup>/Fc was estimated as +0.079 V vs. Ag/Ag<sup>+</sup> (0.01 M AgNO<sub>3</sub>, 0.1 M tetrabutylammonium perchloride acetonitrile solution) and +0.188 V vs. Ag/AgCl (3 M NaCl aqueous solution). Given that the standard potential of Ag/AgCl (3 M NaCl aqueous, 25 °C) is +0.195 V vs. SHE, the potential can be converted using the following equation:

$$E(\text{V vs SHE}) = E(\text{V vs Ag/Ag}^+) + 0.304.$$

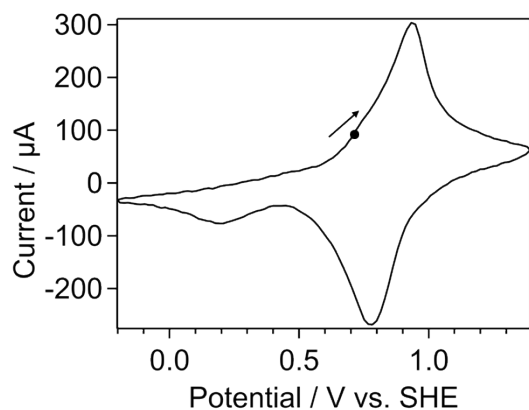

**Figure S12.** CVs of HEMHCF in 0.05 M  $\text{KH}_2\text{PO}_4$  aqueous solution. Initial potential was set to the open rest potential, and scanning began in the anodic direction ( $50 \text{ mV s}^{-1}$ ).

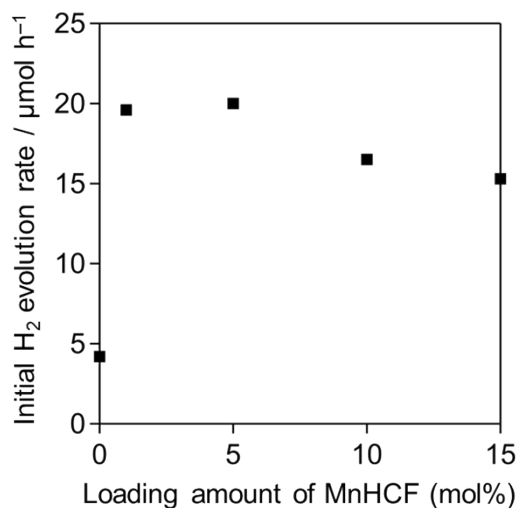

**Figure S13.** Dependence of the initial  $\text{H}_2$  evolution rate on the MnHCF loading amount. Photocatalytic reactions were conducted using 25 mg of RCO/TaON modified with different MnHCF loading amounts in 0.05 M aqueous  $\text{KH}_2\text{PO}_4$  containing 1 mM  $\text{SiV}^{\text{IV}}$  under visible-light irradiation ( $\lambda > 400 \text{ nm}$ ).

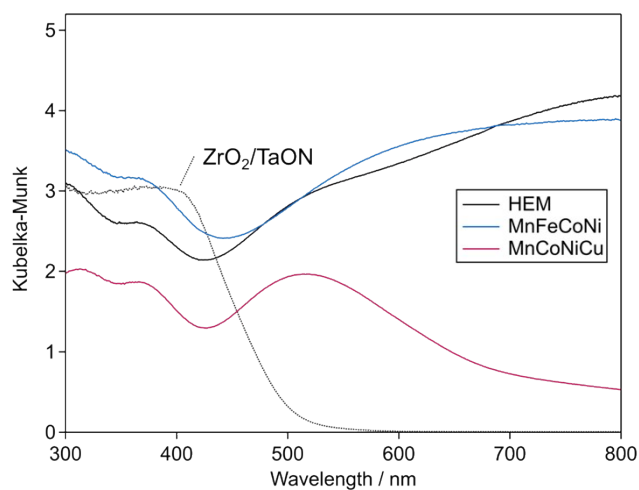

**Figure S14.** UV-Vis diffuse reflectance spectra of MHCFs ( $M_N = \text{HEM}, \text{MnFeCoNi}, \text{MnCoNiCu}$ ) with  $\text{Fe}_C = \text{Fe}^{\text{II}}$  overlaying that of  $\text{ZrO}_2/\text{TaON}$ .

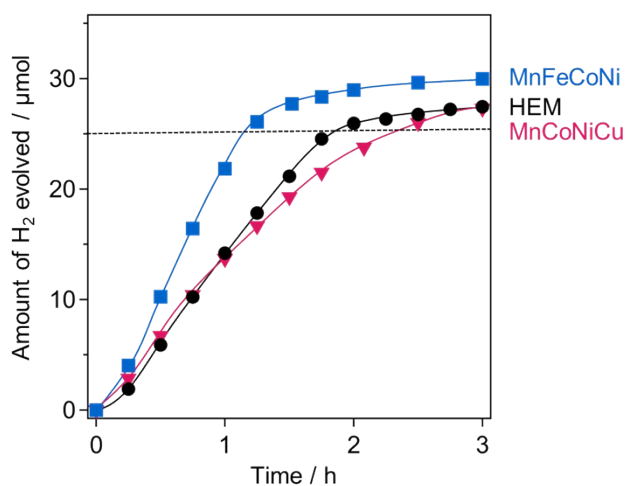

**Figure S15.** Time course of  $\text{H}_2$  evolution under visible light irradiation over MHCF ( $M = \text{HEM}, \text{MnFeCoNi}, \text{and MnCoNiCu}$ ) modified  $\text{RCO}/\text{TaON}$  in the presence of  $0.5 \text{ mM Si}^{\text{V}^{\text{IV}}}$  in aqueous  $\text{KH}_2\text{PO}_4$  solution ( $50 \text{ mM KH}_2\text{PO}_4$ ,  $\text{pH } 4.5$ ,  $100 \text{ mL}$ ). Dotted lines show the amount of  $\text{H}_2$  evolution corresponding to one electron donation by  $\text{Si}^{\text{V}^{\text{IV}}}$ .

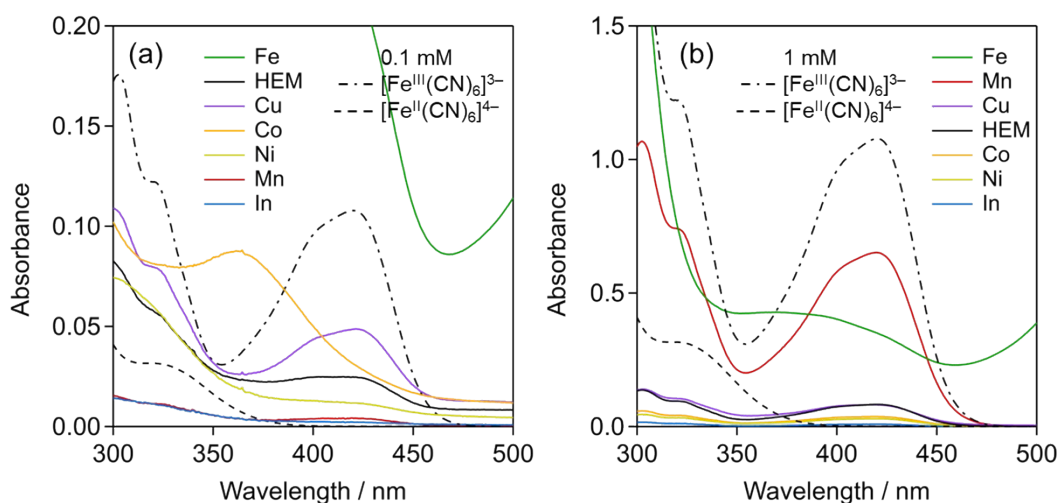

**Figure S16.** UV–Vis absorption spectra of the solution filtered after stirring MHCF particles in pure water with a magnetic stirrer: (a)  $\text{Fe}_C = \text{Fe}^{\text{II}}$  and (b)  $\text{Fe}_C = \text{Fe}^{\text{III}}$ , along with those of  $[\text{Fe}^{\text{III}}(\text{CN})_6]^{3-}$  and  $[\text{Fe}^{\text{II}}(\text{CN})_6]^{4-}$  as references.

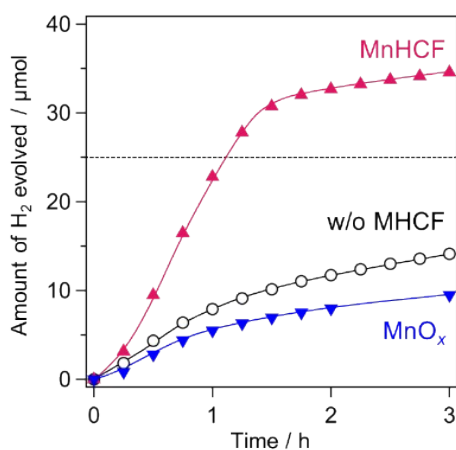

**Figure S17.** Time courses of  $\text{H}_2$  evolution under visible light irradiation over MnHCF/RCO/TaON (red),  $\text{MnO}_x$ /RCO/TaON (blue), and RCO/TaON (open) in the presence of  $0.5 \text{ mM SiV}^{\text{IV}}$  in aqueous  $\text{KH}_2\text{PO}_4$  solution ( $50 \text{ mM KH}_2\text{PO}_4$ ,  $\text{pH } 4.5$ ,  $100 \text{ mL}$ ). Dotted lines show the amount of  $\text{H}_2$  evolution corresponding to one electron donation by  $\text{SiV}^{\text{IV}}$ .  $\text{MnO}_x$  was deposited on RCO/TaON by photodeposition method. RCO/TaON ( $50 \text{ mg}$ ) was suspended in aqueous solution of  $2.5 \text{ mM MnCl}_2 \cdot 4\text{H}_2\text{O}$  ( $2.5 \text{ mM}$ ,  $100 \text{ mL}$ ). The suspension was irradiated with visible light ( $\lambda > 400 \text{ nm}$ ) for 2 h.

## References

- 1 M. Weishaupt and J. Strähle, *Zeitschrift anorg allge chemie*, 1977, 429, 261–269.
- 2 A. M. Kusainova, S. Y. Stefanovich, V. A. Dolgikh, A. V. Mosunov, C. H. Hervochoes and P. Lightfoot, *J. Mater. Chem.*, 2001, 11, 1141–1145.
- 3 J. J. Altenau, M. T. Pope, R. A. Prados and Hyunsoo. So, *Inorg. Chem.*, 1975, 14, 417–421.
- 4 O. Tomita, H. Naito, A. Nakada, M. Higashi and R. Abe, *Sustainable Energy Fuels*, 2022, 6, 664–673.
- 5 O. Tomita, K. Tachizawa, T. Kido, H. Suzuki, A. Nakada and R. Abe, *Adv Funct Materials*, 2025, 35, 2505908.
- 6 X. Lamprecht, F. Speck, P. Marzak, S. Cherevko and A. S. Bandarenka, *ACS Appl. Mater. Interfaces*, 2022, 14, 3515–3525.
- 7 L. Wang, Y. Lu, J. Liu, M. Xu, J. Cheng, D. Zhang and J. B. Goodenough, *Angew Chem Int Ed*, 2013, 52, 1964–1967.
- 8 L. Chen, H. Shao, X. Zhou, G. Liu, J. Jiang and Z. Liu, *Nat Commun*, 2016, 7, 11982.
- 9 D. R. Shankaran and S. S. Narayanan, *Fresenius' Journal of Analytical Chemistry*, 1999, 364, 686–689.
- 10 O. Makowski, J. Stroka, P. J. Kulesza, M. A. Malik and Z. Galus, *Journal of Electroanalytical Chemistry*, 2002, 532, 157–164.
- 11 M. Giorgetti, L. Guadagnini, D. Tonelli, M. Minicucci and G. Aquilanti, *Phys. Chem. Chem. Phys.*, 2012, 14, 5527.
- 12 L. Guadagnini, D. Tonelli and M. Giorgetti, *Electrochimica Acta*, 2010, 55, 5036–5039.
- 13 B. Wang, Y. Han, X. Wang, N. Bahlawane, H. Pan, M. Yan and Y. Jiang, *iScience*, 2018, 3, 110–133.
- 14 D. Ellis, M. Eckhoff and V. D. Neff, *J. Phys. Chem.*, 1981, 85, 1225–1231.
- 15 J. Song, L. Wang, Y. Lu, J. Liu, B. Guo, P. Xiao, J.-J. Lee, X.-Q. Yang, G. Henkelman and J. B. Goodenough, *J. Am. Chem. Soc.*, 2015, 137, 2658–2664.
- 16 R. Benedek, *J. Phys. Chem. C*, 2017, 121, 22049–22053.
- 17 J. C. Hunter, *Journal of Solid State Chemistry*, 1981, 39, 142–147.
- 18 H. N. Wilson and J. G. M. Bremner, *Q. Rev. Chem. Soc.*, 1948, 2, 1–24.
- 19 H. G. Dion and P. J. G. Mann, *The Journal of Agricultural Science*, 1946, 36, 239–245.
